# Supplementary material for: Theoretical studies on the coupling interactions in H2SO4⋯HOO˙⋯(H2O)n (n = 0–2) clusters: toward understanding the role of water molecules in the uptake of HOO˙ radical by sulfuric acid aerosols
Source: Royal Society of Chemistry journal article supplement (doi:10.1039/c0cp00908c), 2010-11-05
Supplement: c0cp00908c.pdf [file c0cp00908c.pdf]

**Theoretical studies on the coupling interactions in  
 $\text{H}_2\text{SO}_4 \cdots \text{HOO}^\bullet \cdots (\text{H}_2\text{O})_n (n=0-2)$  clusters: Toward understanding the role of  
water molecules in the uptake of  $\text{HOO}^\bullet$  radical by sulfuric acid aerosols**

*Ping Li<sup>\*,a,b</sup>, Zhiying Ma<sup>a</sup>, Weihua Wang<sup>a</sup>, Yazhou Zhai<sup>a</sup>, Haitao Sun<sup>a</sup>, Siwei Bi<sup>a</sup>, Yuxiang Bu<sup>\*,a,b</sup>*

*<sup>a</sup> Key Laboratory of Life-Organic Analysis, School of Chemistry and Chemical Engineering,  
Qufu Normal University, Qufu, 273165, P. R. China*

*<sup>b</sup> Key Laboratory of Colloid and Interface Chemistry (Shandong University), Ministry of  
Education, Jinan 250100, P. R. China*

**Supplementary Information**

## 1. Comparisons between B3LYP and MP2 methods

As mentioned in the section of computational methods, the MP2 method has also been used for clusters **R1** and **N1** employing the same basis set. As a result, the reliability of the B3LYP method can be confirmed through the comparisons of the geometry and binding energy with MP2 method, which is summarized as follows.

As displayed in Fig. S1, the optimized geometries for clusters **R1** and **N1** are well consistent with each other at both levels. Taking **R1** as an example, as presented in Table S1, the intermolecular H-bond distances are 1.665 and 1.704 Å for O10...H7-O6 and O2...H9-O8 at the B3LYP/6-311++G(3df,3pd) level of theory, which are larger by only 0.051 and 0.048 Å than those of MP2 results. On the other hand, the bond distance variations of the O-H bonds associated with the intermolecular H-bonds can be comparable to each other at both levels. For clusters **N1**, the same results can be also observed. Therefore, the predicted geometrical features at the B3LYP method can be comparable to the MP2 method.

As for the calculated binding energy of **R1** and **N1** according to reaction (1) in the text, B3LYP method can give well consistent results with MP2 method. For example, as presented in Table S1, the calculated value of -11.59 kcal mol<sup>-1</sup> for **R1** cluster can be comparable to that of -11.55 kcal mol<sup>-1</sup> at the MP2 level. In other words, only a difference of 0.04 kcal mol<sup>-1</sup> has been observed for the calculated binding energy of **R1** cluster at both levels. Similarly, a small difference of 0.45 kcal mol<sup>-1</sup> has been observed for the binding energy of **N1** cluster at both levels.

Therefore, the reliability and validity of the B3LYP/6-311++G(3df,3pd) level of theory employed should be confirmed for the studied systems.

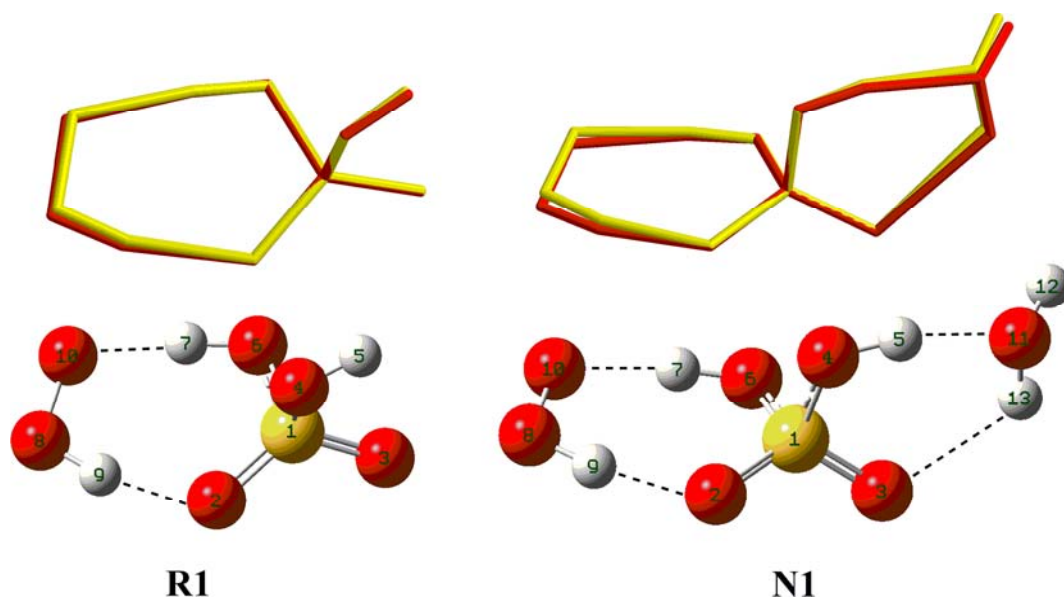

**Fig. S1** The superposition of two geometries for clusters **R1** and **N1** employing the B3LYP (red color) and MP2 (yellow color) methods at the 6-311++G(3df,3pd) basis set.

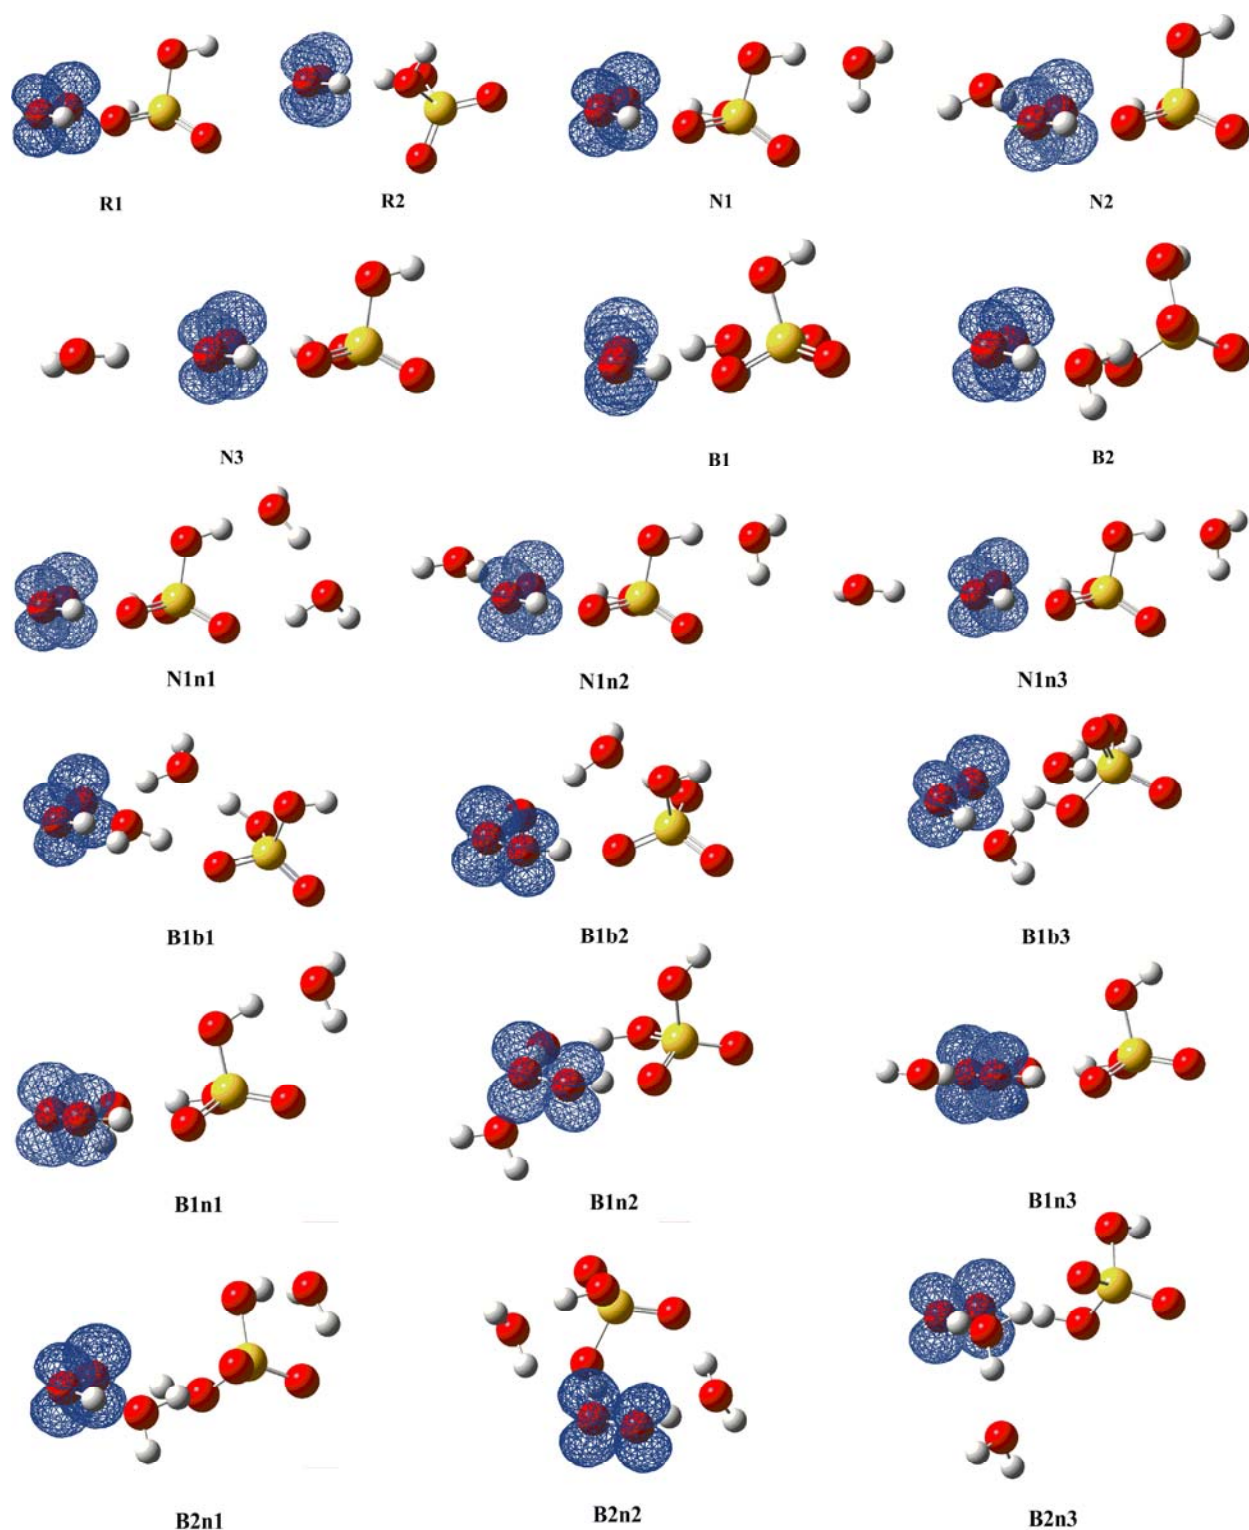

**Fig. S2** Spin density maps of  $\text{H}_2\text{SO}_4 \cdots \text{HOO} \cdots (\text{H}_2\text{O})_n$  ( $n=0-2$ ) clusters. The isodensity contours are  $0.003 \text{ electron bohr}^{-3}$ .

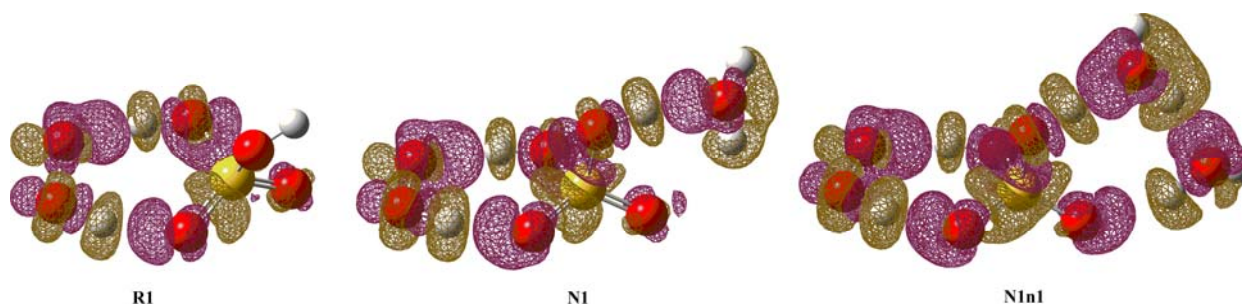

**Fig. S3** Electron density difference maps for clusters **R1**, **N1**, and **N1n1**. The yellow regions represent depleted electron density and violet regions designate increased electron density. The isodensity contours are  $0.002 \text{ electron bohr}^{-3}$ .

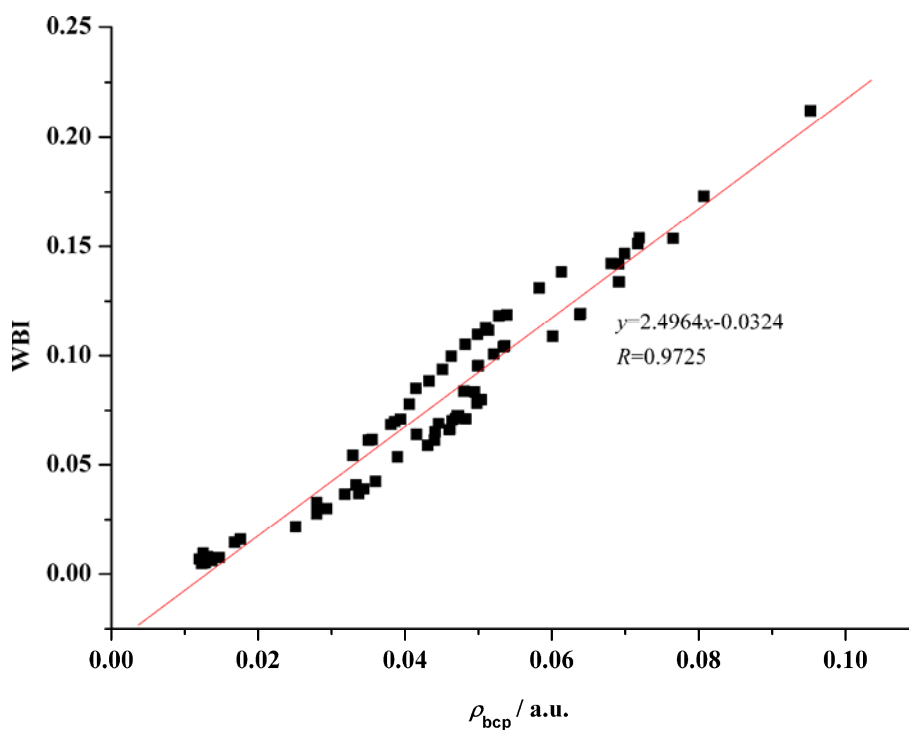

**Fig. S4** The WBI as a function of the electron density at the BCP of the intermolecular H-bond.

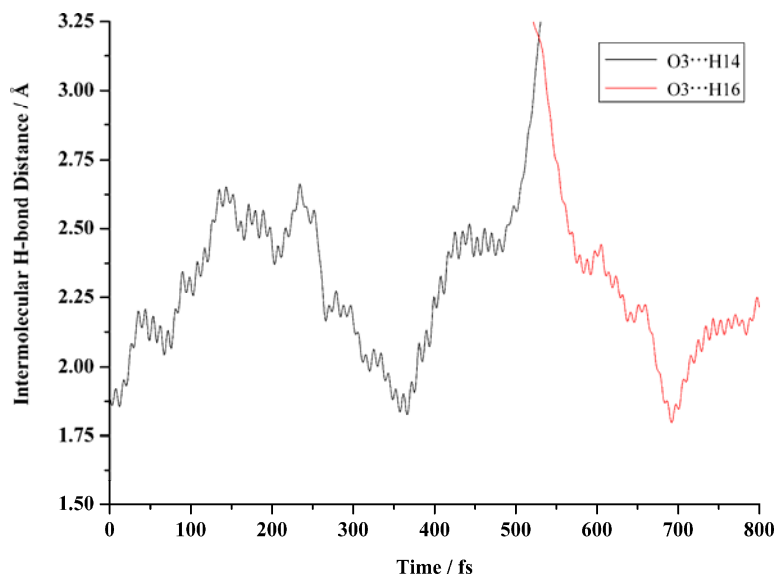

**Fig. S5** The variations of H-bond distances between  $\text{H}_2\text{SO}_4$  and the second water in **N1n1** cluster as a function of time.

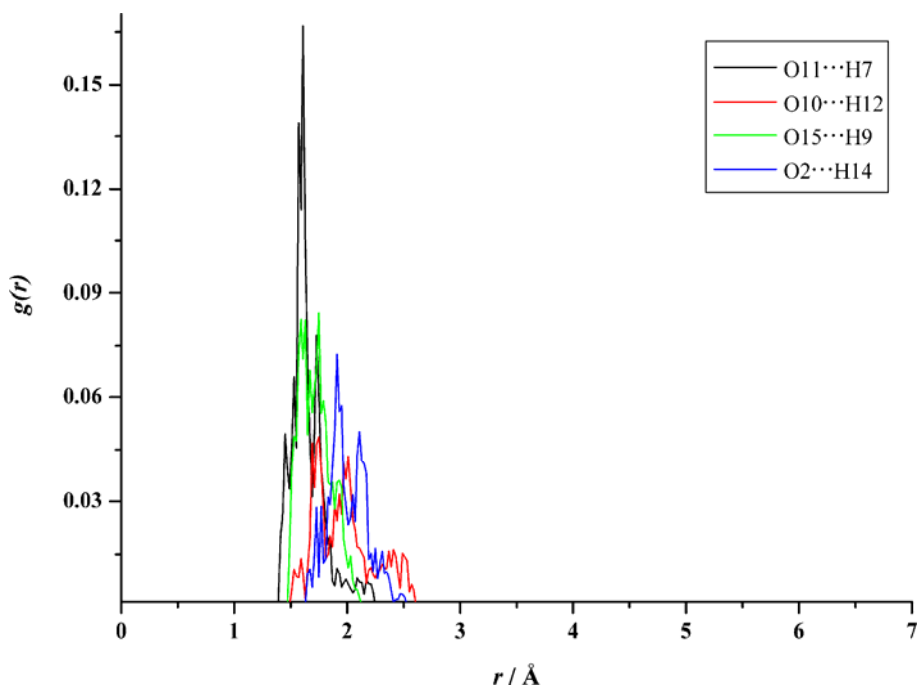

**Fig. S6** Radial distribution functions for the H-bond distances in **B1b1** cluster.

**Table S1** The comparison between the B3LYP and MP2 methods at the 6-311++G(3df,3pd) basis set for clusters **R1** and **N1**.

|                                                                                                                                                                                                                      |                                     | B3LYP              | MP2                |
|----------------------------------------------------------------------------------------------------------------------------------------------------------------------------------------------------------------------|-------------------------------------|--------------------|--------------------|
| The selected structure parameters                                                                                                                                                                                    |                                     |                    |                    |
| <b>R1</b>                                                                                                                                                                                                            | $R(\text{O10}\cdots\text{H7-O6})^a$ | 1.665              | 1.614              |
|                                                                                                                                                                                                                      | $R(\text{O2}\cdots\text{H9-O8})$    | 1.704              | 1.656              |
|                                                                                                                                                                                                                      | $\Delta r(\text{H7-O6})^b$          | 0.037              | 0.040              |
|                                                                                                                                                                                                                      | $\Delta r(\text{H9-O8})$            | 0.023              | 0.026              |
| <b>N1</b>                                                                                                                                                                                                            | $R(\text{O10}\cdots\text{H7-O6})$   | 1.679              | 1.631              |
|                                                                                                                                                                                                                      | $R(\text{O2}\cdots\text{H9-O8})$    | 1.684              | 1.643              |
|                                                                                                                                                                                                                      | $R(\text{O11}\cdots\text{H5-O4})$   | 1.652              | 1.638              |
|                                                                                                                                                                                                                      | $R(\text{O3}\cdots\text{H13-O11})$  | 2.263              | 2.235              |
|                                                                                                                                                                                                                      | $\Delta r(\text{H7-O6})$            | 0.035              | 0.037              |
|                                                                                                                                                                                                                      | $\Delta r(\text{H9-O8})$            | 0.024              | 0.028              |
|                                                                                                                                                                                                                      | $\Delta r(\text{H5-O4})$            | 0.034              | 0.032              |
|                                                                                                                                                                                                                      | $\Delta r(\text{H13-O11})$          | 0.007              | 0.007              |
| The calculated binding energy for the reaction:<br>$\text{H}_2\text{SO}_4 + \text{HOO}^\bullet + n\text{H}_2\text{O} \rightarrow \text{H}_2\text{SO}_4\cdots\text{HOO}^\bullet\cdots(\text{H}_2\text{O})_n(n=0-1)^c$ |                                     |                    |                    |
| <b>R1</b>                                                                                                                                                                                                            |                                     | -11.59(1.97)[0.90] | -11.55(2.23)[2.96] |
| <b>N1</b>                                                                                                                                                                                                            |                                     | -20.56(4.23)[1.48] | -21.01(4.53)[4.64] |

<sup>a</sup>  $R$  refers to the H-bond length (in angstroms).

<sup>b</sup>  $\Delta r$  refers to the changes of O-H bonds upon the formation of clusters (in angstroms).

<sup>c</sup> The binding energies consider BSSE and ZPVE corrections (in kcal mol<sup>-1</sup>), where the data in parentheses and brackets refer to the ZPVE and BSSE corrections, respectively.

**Table S2** The stretching vibrational frequencies and corresponding red-shifts of the O-H bonds involved in the intermolecular H-bonds in all the clusters <sup>a</sup>

| Monomers/Clusters                                                                 | H-bonds     | $\nu^b$         | $\Delta\nu^b$  |
|-----------------------------------------------------------------------------------|-------------|-----------------|----------------|
| H <sub>2</sub> SO <sub>4</sub>                                                    | O6-H7/O5-H4 | 3769.3          |                |
| HOO <sup>•</sup>                                                                  | O-H         | 3604.2          |                |
| H <sub>2</sub> O                                                                  | O-H         | 3815.7(3914.8)  |                |
| H <sub>2</sub> SO <sub>4</sub> ⋯HOO <sup>•</sup>                                  |             |                 |                |
| <b>R1</b>                                                                         | O10⋯H7-O6   | 3013.7(3239.4)* | -755.7(-530.0) |
|                                                                                   | O2⋯H9-O8    | 3013.7(3239.4)* | -590.5(-364.8) |
| <b>R2</b>                                                                         | O10⋯H7-O6   | 3256.2          | -513.1         |
|                                                                                   | O4⋯H9-O8    | 3431.4          | -172.8         |
| H <sub>2</sub> SO <sub>4</sub> ⋯HOO <sup>•</sup> ⋯H <sub>2</sub> O                |             |                 |                |
| <b>N1</b>                                                                         | O10⋯H7-O6   | 3047.1(3217.6)* | -722.2(-551.7) |
|                                                                                   | O2⋯H9-O8    | 3047.1(3217.6)* | -557.0(-386.6) |
|                                                                                   | O11⋯H5-O4   | 3093.2          | -676.2         |
|                                                                                   | O3⋯H13-O11  | 3749.9          | -65.8          |
| <b>N2</b>                                                                         | O10⋯H7-O6   | 3119.2(3238.9)* | -650.2(-530.5) |
|                                                                                   | O2⋯H9-O8    | 3119.2(3238.9)* | -485.0(-365.3) |
|                                                                                   | O10⋯H12-O11 | 3775.5          | -40.2          |
| <b>N3</b>                                                                         | O10⋯H7-O6   | 3078.1(3209.6)* | -691.3(-559.8) |
|                                                                                   | O2⋯H9-O8    | 3078.1(3209.6)* | -526.1(-394.6) |
|                                                                                   | O8⋯H12-O11  | 3805.7          | -10.0          |
| <b>B1</b>                                                                         | O11⋯H7-O6   | 2662.8          | -1106.5        |
|                                                                                   | O10⋯H12-O11 | 3429.9          | -385.8         |
|                                                                                   | O2⋯H9-O8    | 3262.7          | -341.5         |
| <b>B2</b>                                                                         | O10⋯H7-O6   | 3037.2          | -732.1         |
|                                                                                   | O11⋯H9-O8   | 2850.0          | -754.2         |
|                                                                                   | O2⋯H13-O11  | 3556.2          | -259.5         |
| H <sub>2</sub> SO <sub>4</sub> ⋯HOO <sup>•</sup> ⋯(H <sub>2</sub> O) <sub>2</sub> |             |                 |                |
| <b>N1n1</b>                                                                       | O10⋯H7-O6   | 3060.7(3206.3)* | -708.6(-563.1) |
|                                                                                   | O2⋯H9-O8    | 3060.7(3206.3)* | -543.4(-397.9) |
|                                                                                   | O11⋯H5-O4   | 2635.3          | -1134.0        |
|                                                                                   | O15⋯H13-O11 | 3375.9          | -439.7         |
|                                                                                   | O3⋯H14-O15  | 3661.9          | -153.7         |
| <b>N1n2</b>                                                                       | O10⋯H7-O6   | 3098.5(3259.9)* | -670.9(-509.4) |
|                                                                                   | O2⋯H9-O8    | 3098.5(3259.9)* | -505.7(-344.3) |
|                                                                                   | O10⋯H12-O11 | 3767.7          | -47.9          |
|                                                                                   | O15⋯H5-O4   | 3063.3          | -706.1         |
|                                                                                   | O3⋯H14-O15  | 3758.8          | -56.8          |
| <b>N1n3</b>                                                                       | O10⋯H7-O6   | 3072.5(3216.8)* | -696.9(-552.5) |
|                                                                                   | O2⋯H9-O8    | 3072.5(3216.8)* | -531.7(-387.4) |
|                                                                                   | O8⋯H12-O11  | 3802.7          | -12.9          |
|                                                                                   | O14⋯H5-O4   | 3059.9          | -709.5         |



|             |               |                 |                 |
|-------------|---------------|-----------------|-----------------|
|             | O3···H16-O14  | 3756.9          | -58.8           |
| <b>B1b1</b> | O11···H7-O6   | 2735.9          | -1033.4         |
|             | O10···H12-O11 | 3417.5          | -398.2          |
|             | O15···H9-O8   | 2957.2          | -647.0          |
| <b>B1b2</b> | O2···H14-O15  | 3566.7          | -249.0          |
|             | O11···H7-O6   | 2467.2          | -1302.2         |
|             | O15···H12-O11 | 3235.1          | -580.6          |
|             | O10···H14-O15 | 3526.6          | -289.1          |
| <b>B1b3</b> | O2···H9-O8    | 3286.2          | -317.9          |
|             | O10···H7-O6   | 2706.5(2909.2)* | -1062.8(-860.2) |
|             | O15···H9-O8   | 2706.5(2909.2)* | -897.7(-695.0)  |
| <b>B1n1</b> | O11···H16-O15 | 3345.3          | -470.4          |
|             | O2···H13-O11  | 3640.5          | -175.1          |
|             | O11···H7-O6   | 2741.8          | -1027.6         |
|             | O10···H12-O11 | 3436.7          | -379.0          |
|             | O2···H9-O8    | 3231.4          | -372.7          |
| <b>B1n2</b> | O14···H5-O4   | 3132.5          | -636.9          |
|             | O3···H16-O14  | 3739.8          | -75.8           |
|             | O11···H7-O6   | 2122.6          | -1646.8         |
|             | O15···H13-O11 | 3571.0          | -244.6          |
|             | O10···H12-O11 | 3495.2          | -320.5          |
|             | O2···H9-O8    | 3229.0          | -375.1          |
| <b>B1n3</b> | O11···H7-O6   | 2701.6          | -1067.7         |
|             | O10···H12-O11 | 3480.7          | -335.0          |
|             | O8···H14-O15  | 3800.0          | -15.7           |
|             | O2···H9-O8    | 3190.7          | -413.5          |
| <b>B2n1</b> | O10···H7-O6   | 3081.4          | -687.9          |
|             | O11···H9-O8   | 2855.6          | -748.6          |
|             | O2···H13-O11  | 3527.6          | -288.1          |
|             | O15···H5-O4   | 3134.3          | -635.1          |
|             | O3···H14-O15  | 3739.7          | -76.0           |
| <b>B2n2</b> | O15···H5-O4   | 3186.1          | -583.3          |
|             | O10···H14-O15 | 3747.1          | -68.6           |
|             | O10···H7-O6   | 3318.6          | -450.7          |
| <b>B2n3</b> | O11···H9-O8   | 2736.4          | -867.8          |
|             | O2···H13-O11  | 3436.0          | -379.7          |
|             | O10···H7-O6   | 2933.1          | -836.2          |
|             | O11···H9-O8   | 2587.1          | -1017.1         |
|             | O15···H12-O11 | 3594.6(3649.8)  | -221.1(-265.1)  |
|             | O2···H13-O11  | 3594.6(3649.8)  | -221.1(-265.1)  |

<sup>a</sup> All the units are in  $\text{cm}^{-1}$ . The asterisk (\*) refers to the significant resonant coupling between the stretching vibrational modes of O6-H7 bond of  $\text{H}_2\text{SO}_4$  fragment and that of O8-H9 bond of  $\text{HOO}^\bullet$  fragment.

<sup>b</sup> The data in parentheses refer to the asymmetric stretching vibrational frequencies.

All the Cartesian coordinates of the geometries obtained at the B3LYP/6-311++G(3df,3pd) level of theory.

### 1. H<sub>2</sub>SO<sub>4</sub>⋯HOO

#### R1

|   |             |             |             |
|---|-------------|-------------|-------------|
| S | 0.88438500  | -0.07133100 | -0.11932400 |
| O | -0.04543400 | -1.15430100 | -0.30647300 |
| O | 2.07084900  | 0.02485500  | -0.89091400 |
| O | 1.27121200  | -0.15192300 | 1.41992200  |
| H | 2.08895200  | 0.34197600  | 1.57694800  |
| O | 0.11246000  | 1.27493300  | -0.23197100 |
| H | -0.86866500 | 1.13034400  | -0.06780000 |
| O | -2.64736000 | -0.60502800 | -0.02465500 |
| H | -1.73389900 | -0.98620000 | -0.15132200 |
| O | -2.46629500 | 0.69336100  | 0.10301100  |

#### R2

|   |             |             |             |
|---|-------------|-------------|-------------|
| S | 0.97006200  | -0.04055300 | 0.10446800  |
| O | 0.70289000  | -0.08878200 | 1.49721700  |
| O | 2.27645900  | 0.02893800  | -0.44409900 |
| O | 0.13467900  | 1.26884200  | -0.40358800 |
| H | 0.45263600  | 1.52950100  | -1.28035400 |
| O | 0.21062500  | -1.18210900 | -0.64991900 |
| H | -0.74925900 | -1.17031200 | -0.39270500 |
| O | -2.59919800 | 0.59070700  | 0.07108400  |
| H | -1.71055200 | 1.00723300  | -0.03008900 |
| O | -2.41468200 | -0.70729200 | -0.06673700 |

### 2. H<sub>2</sub>SO<sub>4</sub>⋯HOO<sup>•</sup>⋯H<sub>2</sub>O

#### N1

|   |             |             |             |
|---|-------------|-------------|-------------|
| S | 0.32112300  | 0.36366700  | 0.12028300  |
| O | -0.74857400 | 1.16925600  | -0.41457900 |
| O | 1.35187500  | 0.97456900  | 0.89747700  |
| O | 0.95874200  | -0.38154900 | -1.09102900 |
| H | 1.92049600  | -0.58545500 | -0.89545300 |
| O | -0.30947900 | -0.77336000 | 0.98394600  |
| H | -1.26325100 | -0.92593100 | 0.71558900  |
| O | -3.19083600 | 0.11890700  | -0.46815500 |
| H | -2.34614900 | 0.64926800  | -0.53562200 |
| O | -2.86579600 | -0.95941600 | 0.21533400  |
| O | 3.47225100  | -0.59643200 | -0.33014100 |
| H | 3.86128100  | -1.39256700 | 0.04383600  |
| H | 3.34419500  | 0.02021100  | 0.40429900  |

#### N2

|           |             |             |             |
|-----------|-------------|-------------|-------------|
| S         | -1.58351700 | -0.05618100 | -0.08615100 |
| O         | -0.99277100 | 1.25603400  | -0.03705800 |
| O         | -2.78297100 | -0.29905100 | -0.80106300 |
| O         | -1.79042100 | -0.44403000 | 1.43867500  |
| H         | -2.41005800 | -1.18495400 | 1.50966200  |
| O         | -0.50794900 | -1.07150800 | -0.57979500 |
| H         | 0.40771000  | -0.71897800 | -0.40228700 |
| O         | 1.65172400  | 1.45248700  | 0.06164600  |
| H         | 0.65665500  | 1.55648500  | 0.04594000  |
| O         | 1.86156100  | 0.16737900  | -0.13178000 |
| O         | 4.73546300  | -0.83584900 | 0.09141800  |
| H         | 3.88698000  | -0.38608300 | 0.00251300  |
| H         | 5.39789800  | -0.17127500 | -0.11374600 |
| <b>N3</b> |             |             |             |
| S         | 1.59670400  | -0.17935900 | -0.11996800 |
| O         | 0.44432700  | -0.99863700 | -0.39272200 |
| O         | 2.79221100  | -0.31431100 | -0.86980300 |
| O         | 1.90787700  | -0.44385200 | 1.41390600  |
| H         | 2.81480000  | -0.17179700 | 1.61683200  |
| O         | 1.16281900  | 1.31710600  | -0.15240600 |
| H         | 0.17714400  | 1.39521400  | -0.00157300 |
| O         | -1.95863300 | 0.07092300  | -0.08549700 |
| H         | -1.14236500 | -0.48994100 | -0.23086300 |
| O         | -1.51499300 | 1.29208800  | 0.13124400  |
| O         | -5.04007800 | -0.63584500 | 0.03341500  |
| H         | -4.14063600 | -0.29448900 | 0.00466200  |
| H         | -5.60444800 | 0.13097300  | -0.09467700 |
| <b>B1</b> |             |             |             |
| S         | 1.24409600  | -0.16009200 | -0.11822200 |
| O         | 0.10140700  | -0.85003100 | -0.65476400 |
| O         | 2.54683300  | -0.42657300 | -0.61500500 |
| O         | 1.19471300  | -0.50281100 | 1.43846600  |
| H         | 2.04274000  | -0.27877500 | 1.84756100  |
| O         | 1.00642300  | 1.36295700  | -0.16797700 |
| H         | 0.01639300  | 1.61571100  | -0.06830800 |
| O         | -2.45181400 | -1.44901400 | -0.11049800 |
| H         | -1.49107400 | -1.25943400 | -0.28817300 |
| O         | -3.02101600 | -0.28628100 | 0.13110900  |
| O         | -1.45535200 | 1.98873600  | 0.08920000  |
| H         | -2.03411000 | 1.19331000  | 0.08445300  |
| H         | -1.80902500 | 2.59480300  | -0.56823100 |
| <b>B2</b> |             |             |             |
| S         | -1.31190000 | 0.09417800  | -0.04794300 |
| O         | -0.58949800 | 1.22577000  | 0.45699300  |

|   |             |             |             |
|---|-------------|-------------|-------------|
| O | -2.52998900 | 0.25976400  | -0.75845100 |
| O | -1.56710800 | -0.80483300 | 1.24031600  |
| H | -2.24944700 | -1.46319800 | 1.04489400  |
| O | -0.38091400 | -0.78601500 | -0.92891300 |
| H | 0.54149100  | -0.92195400 | -0.54855700 |
| O | 3.04843600  | -0.64120300 | 0.12767700  |
| H | 2.68906700  | 0.30827900  | 0.07093700  |
| O | 2.03815000  | -1.44669600 | -0.11548600 |
| O | 2.06816500  | 1.75793900  | 0.06268900  |
| H | 2.20744200  | 2.33410700  | -0.69398700 |
| H | 1.10391500  | 1.71810700  | 0.21520000  |

### 3. H<sub>2</sub>SO<sub>4</sub>⋯HOO<sup>•</sup>⋯(H<sub>2</sub>O)<sub>2</sub>

#### N1n1

|   |             |             |             |
|---|-------------|-------------|-------------|
| S | 0.11724500  | -0.40695500 | -0.21129600 |
| O | 1.27316800  | -0.89925800 | -0.91914400 |
| O | -0.96289800 | -1.30876700 | 0.04804300  |
| O | -0.37365800 | 0.83203900  | -0.98639100 |
| H | -1.28897800 | 1.18080900  | -0.67353700 |
| O | 0.58485600  | 0.14627400  | 1.17634500  |
| H | 1.54543700  | 0.42464400  | 1.12436100  |
| O | 3.63589100  | 0.08181400  | -0.20435000 |
| H | 2.83141300  | -0.35869200 | -0.60438600 |
| O | 3.19099400  | 0.70302900  | 0.86895100  |
| O | -2.67575300 | 1.67347300  | -0.26914900 |
| H | -2.70990300 | 2.36141000  | 0.40103000  |
| H | -3.19598900 | 0.90672900  | 0.06904900  |
| H | -2.82418800 | -1.14614500 | 0.39798300  |
| O | -3.69020900 | -0.70934600 | 0.45931800  |
| H | -4.09283700 | -1.01153000 | 1.27724300  |

#### N1n2

|   |             |             |             |
|---|-------------|-------------|-------------|
| S | -1.06675200 | -0.41813700 | 0.16966100  |
| O | -0.25844700 | -1.52861000 | -0.27166200 |
| O | -2.20110100 | -0.64942600 | 1.00288800  |
| O | -1.50634900 | 0.34076900  | -1.11598700 |
| H | -2.36341400 | 0.83428600  | -0.94324800 |
| O | -0.13754600 | 0.59375700  | 0.91873400  |
| H | 0.80395300  | 0.48377100  | 0.61822000  |
| O | 2.34567000  | -1.20246100 | -0.51670000 |
| H | 1.38088200  | -1.47627100 | -0.49399400 |
| O | 2.37040000  | -0.01083800 | 0.04288200  |
| O | 5.08513900  | 1.36013600  | 0.09353200  |
| H | 4.28026300  | 0.83045500  | 0.04115300  |
| H | 5.79417200  | 0.77009800  | -0.17400800 |

|   |             |            |             |
|---|-------------|------------|-------------|
| H | -3.89301700 | 0.83321100 | 0.39942900  |
| O | -3.82056300 | 1.36350200 | -0.40584700 |
| H | -3.95241700 | 2.28000100 | -0.14484200 |

**N1n3**

|   |             |             |             |
|---|-------------|-------------|-------------|
| S | -1.04294500 | -0.08457600 | 0.37425300  |
| O | 0.11548500  | -0.86887600 | 0.72777300  |
| O | -2.15070800 | -0.01100900 | 1.27043500  |
| O | -1.52517200 | -0.60851000 | -1.00978000 |
| H | -2.51680300 | -0.47784900 | -1.09857800 |
| O | -0.56934300 | 1.37771900  | 0.08907700  |
| H | 0.40179500  | 1.38743800  | -0.13820800 |
| O | 2.50024400  | 0.00271800  | 0.04390800  |
| H | 1.67253300  | -0.47462800 | 0.35101000  |
| O | 2.09076200  | 1.18555400  | -0.36746700 |
| O | 5.56406300  | -0.67428100 | -0.29212100 |
| H | 4.64635800  | -0.39632600 | -0.20551800 |
| H | 6.05576500  | 0.13422000  | -0.45775200 |
| O | -4.12894300 | -0.29517300 | -0.86542400 |
| H | -4.62023400 | 0.41355000  | -1.29154400 |
| H | -4.12339800 | -0.09832400 | 0.08133800  |

**B1b1**

|   |             |             |             |
|---|-------------|-------------|-------------|
| S | 1.77112100  | -0.11305400 | -0.22067000 |
| O | 0.67397100  | -1.01497400 | -0.42304600 |
| O | 2.95323800  | -0.21992000 | -1.00205000 |
| O | 2.15001200  | -0.30342100 | 1.31906500  |
| H | 3.02736200  | 0.07143000  | 1.48007300  |
| O | 1.27979800  | 1.34946200  | -0.29961600 |
| H | 0.34050400  | 1.48665600  | 0.07985300  |
| O | -3.74843600 | -0.43619600 | -0.44211000 |
| H | -2.98257800 | -0.96896900 | -0.04959200 |
| O | -3.36913600 | 0.82433200  | -0.43579500 |
| O | -1.04307800 | 1.75941800  | 0.68709900  |
| H | -1.84467700 | 1.35936200  | 0.28032200  |
| H | -1.25853800 | 2.67673500  | 0.87600600  |
| H | -0.87323600 | -1.53567700 | 0.27737800  |
| O | -1.76366500 | -1.77673600 | 0.59777200  |
| H | -1.80839600 | -2.73638300 | 0.57613000  |

**B1b2**

|   |            |             |             |
|---|------------|-------------|-------------|
| S | 1.46996100 | -0.23346200 | -0.19181400 |
| O | 0.13565600 | -0.59404000 | -0.59593400 |
| O | 2.59903400 | -0.72472300 | -0.90135400 |
| O | 1.55215300 | -0.73230900 | 1.32237300  |
| H | 2.47900800 | -0.77701200 | 1.59655700  |
| O | 1.58176400 | 1.29549600  | -0.09121800 |

|   |             |             |             |
|---|-------------|-------------|-------------|
| H | 0.70078700  | 1.75825300  | 0.20780200  |
| O | -1.91834800 | -2.11795400 | 0.22939900  |
| H | -1.13267300 | -1.57473700 | -0.04639900 |
| O | -2.95923700 | -1.31034900 | 0.21092900  |
| O | -0.54929900 | 2.41608000  | 0.64337300  |
| H | -1.36515500 | 2.07948300  | 0.18768200  |
| H | -0.59174200 | 3.37541500  | 0.65417000  |
| H | -2.79294800 | 0.45554100  | -0.27809500 |
| O | -2.70417300 | 1.39516000  | -0.53689100 |
| H | -2.71704500 | 1.39955500  | -1.49810500 |

**B1b3**

|   |             |             |             |
|---|-------------|-------------|-------------|
| S | 1.49946100  | 0.06583300  | 0.07221600  |
| O | 0.87129900  | 0.80734600  | -0.98011900 |
| O | 2.35697600  | 0.70012200  | 1.01330100  |
| O | 2.30489800  | -1.07531700 | -0.68991200 |
| H | 2.94390800  | -1.47827400 | -0.08481000 |
| O | 0.43390300  | -0.72021100 | 0.88674500  |
| H | -0.29879000 | -1.13834600 | 0.32213400  |
| O | -2.69321300 | -1.54636100 | -0.32583700 |
| H | -2.67176900 | -0.65576300 | 0.18025200  |
| O | -1.45240200 | -1.97293200 | -0.40811800 |
| O | -1.39276900 | 2.43913200  | -0.69791800 |
| H | -1.21842100 | 3.37536200  | -0.57461800 |
| H | -0.53868300 | 2.01560600  | -0.89064500 |
| H | -2.21800400 | 0.71590000  | 1.77775300  |
| O | -2.64870700 | 0.70455700  | 0.91824500  |
| H | -2.22950300 | 1.42150100  | 0.38339300  |

**B1n1**

|   |             |             |             |
|---|-------------|-------------|-------------|
| S | -0.71478600 | -0.01727900 | 0.48235000  |
| O | 0.47662600  | -0.69843600 | 0.92146900  |
| O | -1.90714400 | -0.12248600 | 1.26358300  |
| O | -0.99381500 | -0.53290300 | -0.96814300 |
| H | -1.97079100 | -0.45693500 | -1.16804400 |
| O | -0.40556200 | 1.48865100  | 0.30923900  |
| H | 0.55474400  | 1.65897600  | 0.00496900  |
| O | 2.79295100  | -1.57270600 | -0.06800300 |
| H | 1.90552400  | -1.27839200 | 0.27849900  |
| O | 3.37434300  | -0.49835200 | -0.56016200 |
| O | 2.00906200  | 1.90673500  | -0.45946300 |
| H | 2.51749800  | 1.06548200  | -0.48670400 |
| H | 2.51948200  | 2.51903900  | 0.07812800  |
| O | -3.63358400 | -0.38487100 | -1.05061000 |
| H | -4.12958300 | 0.34306400  | -1.43666400 |
| H | -3.66331500 | -0.25982100 | -0.09106300 |

**B1n2**

|   |             |             |             |
|---|-------------|-------------|-------------|
| S | -1.53922600 | -0.39852800 | -0.16835100 |
| O | -0.82148900 | 0.61196500  | -0.90516700 |
| O | -2.60502500 | -1.10541200 | -0.78920200 |
| O | -2.11268700 | 0.40066800  | 1.09208700  |
| H | -2.78992200 | -0.13351100 | 1.53013800  |
| O | -0.55883600 | -1.40225900 | 0.44262500  |
| H | 0.39762300  | -0.99391100 | 0.65869200  |
| O | 0.74634800  | 2.71998700  | -0.45224200 |
| H | 0.12276700  | 1.95690100  | -0.60400800 |
| O | 1.74856600  | 2.24156800  | 0.25697300  |
| O | 1.68702700  | -0.46871500 | 0.95018500  |
| H | 1.73463800  | 0.48008700  | 0.71027100  |
| H | 2.40930800  | -0.92235600 | 0.47518100  |
| H | 4.63923600  | -1.69640000 | -0.16260500 |
| O | 3.71729300  | -1.80629300 | -0.41281200 |
| H | 3.70439500  | -1.84642900 | -1.37363700 |

**B1n3**

|   |             |             |             |
|---|-------------|-------------|-------------|
| S | 1.66675400  | -0.57130800 | -0.11569500 |
| O | 0.34669200  | -0.61342400 | -0.68951300 |
| O | 2.68960800  | -1.42696800 | -0.59937400 |
| O | 1.41450500  | -0.86819400 | 1.42927800  |
| H | 2.25040300  | -1.10104100 | 1.85831500  |
| O | 2.19365500  | 0.87839000  | -0.13280800 |
| H | 1.44605400  | 1.57273500  | -0.04210400 |
| O | -2.16647800 | 0.00478600  | -0.13818000 |
| H | -1.22298900 | -0.26965100 | -0.32020700 |
| O | -2.14615000 | 1.29779000  | 0.11097200  |
| O | 0.31866800  | 2.60511400  | 0.10264300  |
| H | -0.56461300 | 2.17924700  | 0.08014600  |
| H | 0.30471200  | 3.31174400  | -0.54951500 |
| H | -4.16683400 | -0.85420900 | -0.04167200 |
| O | -5.03542000 | -1.26872900 | -0.00732700 |
| H | -5.63542900 | -0.56801900 | 0.26062500  |

**B2n1**

|   |             |             |             |
|---|-------------|-------------|-------------|
| S | -0.77193700 | -0.52455500 | 0.07803900  |
| O | 0.17070300  | -1.45788900 | -0.47195800 |
| O | -1.89188200 | -1.00512400 | 0.82532200  |
| O | -1.27014400 | 0.34577200  | -1.11960200 |
| H | -2.16590000 | 0.73213500  | -0.89776000 |
| O | -0.02956800 | 0.48464400  | 1.00786300  |
| H | 0.81189100  | 0.86099800  | 0.61091200  |
| O | 3.30117100  | 1.21111300  | -0.14515000 |
| H | 3.16422800  | 0.20343600  | -0.14337200 |

|   |             |             |             |
|---|-------------|-------------|-------------|
| O | 2.14577600  | 1.75182500  | 0.17514900  |
| O | 2.88322800  | -1.34694300 | -0.20773900 |
| H | 3.17831300  | -1.90896200 | 0.51394400  |
| H | 1.92682700  | -1.51770000 | -0.32490200 |
| H | -3.63404100 | 0.32614900  | 0.42766800  |
| O | -3.68788600 | 1.00017900  | -0.26515800 |
| H | -3.90151800 | 1.82819400  | 0.17507300  |

**B2n2**

|   |             |             |             |
|---|-------------|-------------|-------------|
| S | -1.33665800 | -0.34825700 | 0.02850000  |
| O | -0.94392700 | -1.67735000 | -0.36568100 |
| O | -2.70265600 | -0.08385000 | 0.30096900  |
| O | -0.75852500 | 0.58785400  | -1.08739000 |
| H | -0.56802700 | 1.51679900  | -0.77927100 |
| O | -0.52587100 | 0.09201200  | 1.30482400  |
| H | 0.44412000  | 0.14796100  | 1.11570400  |
| O | 2.85964700  | 0.06425800  | -0.09317500 |
| H | 2.45014400  | -0.87186500 | -0.17767100 |
| O | 2.02284500  | 0.75879700  | 0.64533500  |
| O | 1.71892200  | -2.22170800 | -0.36085000 |
| H | 1.88909600  | -2.94442400 | 0.24948800  |
| H | 0.74200300  | -2.12793100 | -0.42447700 |
| H | 1.09638100  | 2.66273600  | -0.00785600 |
| O | 0.20713200  | 2.92149700  | -0.28593400 |
| H | 0.31227500  | 3.65676000  | -0.89669800 |

**B2n3**

|   |             |             |             |
|---|-------------|-------------|-------------|
| S | 1.55669000  | -0.47160400 | 0.00760400  |
| O | 0.66293200  | -0.73896300 | 1.09502500  |
| O | 2.29725300  | -1.51540100 | -0.61106200 |
| O | 2.56774800  | 0.61150200  | 0.59467500  |
| H | 3.34098700  | 0.67532100  | 0.01616400  |
| O | 0.81687300  | 0.29685200  | -1.12254300 |
| H | 0.19938000  | 1.02929800  | -0.79519300 |
| O | -1.85771000 | 2.28625100  | 0.08043500  |
| H | -1.95532500 | 1.32006200  | 0.43340300  |
| O | -0.71858200 | 2.34125200  | -0.57351900 |
| O | -2.04749700 | -0.08228000 | 0.98704500  |
| H | -2.56210400 | -0.74040300 | 0.48602400  |
| H | -1.16100100 | -0.45573000 | 1.13148800  |
| H | -3.55713500 | -2.02798700 | -1.39019900 |
| O | -3.56525000 | -1.95833700 | -0.43131500 |
| H | -4.45799400 | -2.18190600 | -0.15327800 |
